# Supplementary material for: Analysis of deubiquitinase OTUD5 as a biomarker and therapeutic target for cervical cancer by bioinformatic analysis
Source: PeerJ. 2020 Jun 30;8:e9146. doi: 10.7717/peerj.9146 (PMC7333649; doi:10.7717/peerj.9146)
Supplement: Supplemental Information 7 — The correlation of OTUD5 and methylation in CESC data from MethHC (http://methhc.mbc.nctu.edu.tw/php/index.php). [file peerj-08-9146-s007.csv]

expression of OTUD5 promoter	methylation
2874.939	0.3116
1784.515	0.2542
2392.653	0.3497
1406.424	0.4245
1528.402	0.4807
1616.542	0.4332
1279.59	0.4416
1175.876	0.4415
1648.42	0.4175
1245.828	0.4215
1105.487	0.4385
685.3645	0.4213
1233.937	0.4087
2617.176	0.4181
2173.65	0.4899
1355.408	0.4764
2289.904	0.124
1552.775	0.3547
1845.344	0.4783
1728.952	0.5116
1729.278	0.3695
943.2139	0.5396
1475.05	0.4276
1754.858	0.4235
1336.369	0.452
1188.428	0.4347
1418.223	0.4781
	0.4727
3030.919	0.4371
2900.865	0.3753
1336.514	0.2478
2645.532	0.2434
2875.892	0.3692
1507.959	0.428
1676.936	0.448
1331.653	0.4343
1737.853	0.4307
1598.41	0.4793
1411.708	0.4078
1258.075	0.4275
2086.207	0.388
1573.486	0.4362
1246.799	0.3913
1430.177	0.3037
1385.865	0.4243
1390.281	0.421
	0.4558
	0.3936
1857.46	0.4087
	0.4293
	0.5214
	0.4061
	0.4431
	0.4029
1766.783	0.4219
2354.878	0.3215
1613.6	0.4466
1604.058	0.399
1599.448	0.4531
1322.974	0.3619
1442.568	0.3807
1478.935	0.4498
1389.604	0.366
2909.521	0.3142
2147.235	0.3081
	0.4418
	0.2423
971.1598	0.4159
1213.002	0.4575
1636.549	0.4446
1421.694	0.2456
2586.636	0.3813
	0.3873
	0.3794
	0.3794
1846.178	0.4902
1620.951	0.4491
1129.768	0.2044
1653.833	0.4337
1772.367	0.4172
2114.959	0.4289
2149.884	0.3709
2723.694	0.4415
1397.038	0.4267
1638.592	0.4391
1699.278	0.4252
1444.95	0.4649
1150.574	0.5425
1898.432	0.2924
1551.494	0.5021
1684.09	0.5223
1204.765	0.4052
1768.934	0.4867
1560.71	0.3896
2587.41	0.3656
1427.438	0.4554
1191.542	0.3977
1069.844	0.4269
1403.987	0.3961
1364.7	0.4633
1069.536	0.3658
1468.481	0.2795
1905.547	0.4184
2358.04	0.1733
2471.997	0.396
1510.463	0.1995
1551.679	0.3857
1339.686	0.471
1417.885	0.4827
768.441	0.4635
1335.682	0.4469
1544.113	0.4197
2642.823	0.4445
876.5625	0.556
1516.778	0.4526
1889.278	0.4466
	0.4772
1124.168	0.4154
1410.682	0.4225
1517.454	0.4505
1344.989	0.4097
1133.513	0.4601
1545.844	0.4701
1412.721	0.4962
1846.829	0.3946
1318.451	0.4141
2084.983	0.4016
1224.302	0.4268
1611.095	0.4434
1349.132	0.49
1501.645	0.321
2647.771	0.1441
1734.14	0.4022
1141.66	0.4579
1776.408	0.4724
1674.795	0.3681
1238.569	0.4464
3484.024	0.3683
1001.755	0.441
1686.31	0.4385
1288.818	0.3592
1322.879	0.5148
1809.848	0.4741
1335.804	0.5077
1307.092	0.441
2014.609	0.4231
1359.345	0.4525
1377.309	0.2509
1198.676	0.4091
1417.034	0.4088
2046.944	0.5151
2038.883	0.4316
994.4634	0.4875
1816.111	0.2177
2637.334	0.3564
1101.924	0.5258
1506.792	0.2634
997.5294	0.4257
1650.171	0.4439
1617.774	0.4332
1140.815	0.4268
1706.591	0.4331
2921.423	0.2789
1662.146	0.4145
1283.936	0.4454
1619.976	0.3989
1143.664	0.4793
2495.939	0.1293
1439.065	0.4161
1490.903	0.5358
	0.4531
1297.98	0.404
2037.931	0.3876
1893.275	0.1464
1881.4	0.4832
1081.092	0.4274
3082.638	0.3716
1235.005	0.4248
1542.47	0.4013
1212.984	0.4405
1745.06	0.3337
2910.774	0.4016
1389.391	0.4954
2745.741	0.3936
	0.4865
1699.954	0.5056
2462.319	0.4538
1032.022	0.4886
	0.3662
	0.396
1699.556	0.3897
2117.158	0.3684
1585.04	0.4516
772.428	0.4836
1755.089	0.4207
978.0093	0.4445
1142.001	0.438
1402.153	0.447
1152.705	0.4771
1281.774	0.4287
1331.279	0.4158
1425.654	0.4211
1805.401	0.4355
	0.417
	0.3719
	0.1987
	0.3744
	0.4786
	0.5247
	0.3703
	0.4923
2345.583	0.4083
1824.092	0.4329
2062.783	0.4641
